# Supplementary material for: Trypanosoma cruzi-infected triatomines and rodents co-occur in a coastal island of northern Chile
Source: PeerJ. 2020 Oct 14;8:e9967. doi: 10.7717/peerj.9967 (PMC7568477; doi:10.7717/peerj.9967)
Supplement: Supplemental Information 6 [file peerj-08-9967-s006.xlsx]

## Sheet: Hoja1
			T. cruzi		IAC		normalization	Ct: Cycle threshold
Island	Species	ID	Ct	par-eq/mL	Ct	pg/uL	par-eq/mL	par-eq/mL: Parasite equivalents/mL
Pan de Azúcar	Abrothrix olivaceus	1	no Ct	0	19.55	0.118883	0	IAC: Internal amplification control
Pan de Azúcar	Abrothrix olivaceus	2	no Ct	0	19.54	0.120074	0	NQ no absolute quantification
Pan de Azúcar	Abrothrix olivaceus	3	no Ct	0	21.23	0.038153	0	ND no evaluated data
Pan de Azúcar	Abrothrix olivaceus	5	no Ct	0	no Ct	0	0
Pan de Azúcar	Abrothrix olivaceus	7	no Ct	0	20.63	0.057403	0
Pan de Azúcar	Abrothrix olivaceus	8	19.21	57.7661	17.6	0.447654	129.042
Pan de Azúcar	Abrothrix olivaceus	9	no Ct	0	17.58	0.453645	0
Pan de Azúcar	Abrothrix olivaceus	13	no Ct	0	17.16	0.599373	0
Pan de Azúcar	Abrothrix olivaceus	15	no Ct	0	21.47	0.03255	0
Pan de Azúcar	Abrothrix olivaceus	16	no Ct	0	22.08	0.021444	0
Pan de Azúcar	Abrothrix olivaceus	18	no Ct	0	26.41	0.001146	0
Pan de Azúcar	Abrothrix olivaceus	19	no Ct	0	19.05	0.167497	0
Pan de Azúcar	Abrothrix olivaceus	20	no Ct	0	24.45	0.004321	0
Pan de Azúcar	Abrothrix olivaceus	21	no Ct	0	20.75	0.05298	0
Pan de Azúcar	Abrothrix olivaceus	22	no Ct	0	23.08	0.010894	0
Pan de Azúcar	Abrothrix olivaceus	23	no Ct	0	19.63	0.112647	0
Pan de Azúcar	Abrothrix olivaceus	25	24.31	1.68362	17.53	0.467513	3.60123
Pan de Azúcar	Abrothrix olivaceus	26	no Ct	0	18.65	0.204132	0
Pan de Azúcar	Abrothrix olivaceus	27	no Ct	0	17.69	0.389842	0
Pan de Azúcar	Abrothrix olivaceus	28	no Ct	0	21.32	0.033441	0
Pan de Azúcar	Abrothrix olivaceus	29	no Ct	0	20.4	0.062565	0
Pan de Azúcar	Abrothrix olivaceus	30	no Ct	0	17.13	0.572355	0
Pan de Azúcar	Abrothrix olivaceus	31	no Ct	0	21.98	0.021467	0
Pan de Azúcar	Abrothrix olivaceus	32	no Ct	0	18.44	0.234616	0
Pan de Azúcar	Abrothrix olivaceus	33	no Ct	0	17.46	0.457314	0
Pan de Azúcar	Abrothrix olivaceus	35	no Ct	0	21.8	0.02412	0
Pan de Azúcar	Abrothrix olivaceus	37	no Ct	0	18.71	0.196131	0
Pan de Azúcar	Abrothrix olivaceus	38	no Ct	0	21.36	0.032537	0
Pan de Azúcar	Abrothrix olivaceus	39	no Ct	0	17.57	0.425199	0
Pan de Azúcar	Abrothrix olivaceus	40	no Ct	0	19.32	0.129522	0
Pan de Azúcar	Abrothrix olivaceus	41	no Ct	0	27.95	0.000377	0
Pan de Azúcar	Abrothrix olivaceus	42	no Ct	0	24.13	0.004998	0
Pan de Azúcar	Abrothrix olivaceus	43	no Ct	0	19.86	0.08987	0
Chañaral	Thylamys elegans	1	no Ct	0	no Ct	0	0
Chañaral	Thylamys elegans	2	no Ct	0	22.83	0.012107	0
Chañaral	Thylamys elegans	3	no Ct	0	no Ct	0	0
Chañaral	Thylamys elegans	4	no Ct	0	no Ct	0	0
Chañaral	Thylamys elegans	5	no Ct	0	23.05	0.01046	0
Chañaral	Thylamys elegans	6	no Ct	0	17.57	0.427345	0
Chañaral	Thylamys elegans	7	no Ct	0	16.65	0.796235	0
Damas	Abrothrix olivaceus	1	no Ct	0	16.94	0.245766	0
Damas	Abrothrix olivaceus	2	no Ct	0	17.95	0.124596	0
Damas	Abrothrix olivaceus	3	no Ct	0	17.45	0.174558	0
Damas	Abrothrix olivaceus	4	no Ct	0	17.45	0.174822	0
Damas	Abrothrix olivaceus	5	no Ct	0	16.67	0.295623	0
Damas	Abrothrix olivaceus	6	no Ct	0	16.37	0.362319	0
Damas	Abrothrix olivaceus	7	no Ct	0	18.4	0.091754	0
Damas	Abrothrix olivaceus	8	no Ct	0	17.69	0.148504	0
Damas	Abrothrix olivaceus	10	no Ct	0	17.59	0.158679	0
Damas	Abrothrix olivaceus	11	no Ct	0	17.44	0.175616	0
Damas	Abrothrix olivaceus	12	34.68	0.004853	17.12	0.28807	<1
Damas	Abrothrix olivaceus	13	no Ct	0	18.24	0.101793	0
Damas	Abrothrix olivaceus	14	no Ct	0	17.81	0.180203	0
Damas	Abrothrix olivaceus	15	no Ct	0	17.54	0.164174	0
Damas	Abrothrix olivaceus	16	no Ct	0	17.7	0.14755	0
Damas	Abrothrix olivaceus	17	no Ct	0	17.11	0.219462	0
Damas	Abrothrix olivaceus	18	32.19	0.025056	17.25	0.19992	<1
Damas	Abrothrix olivaceus	20	no Ct	0	17.62	0.155405	0
Damas	Abrothrix olivaceus	21	32.68	0.019319	17.2	0.205721	<1
Damas	Abrothrix olivaceus	23	no Ct	0	17.7	0.146794	0
Santa María	Mepraia sp.	1	no Ct	NQ	ND	ND	ND
Santa María	Mepraia sp.	2	45.8611	NQ	ND	ND	ND
Santa María	Mepraia sp.	3	39.0451	NQ	ND	ND	ND
Santa María	Mepraia sp.	4	34.3826	NQ	ND	ND	ND
Santa María	Mepraia sp.	5	46.9885	NQ	ND	ND	ND
Santa María	Mepraia sp.	6	no Ct	NQ	ND	ND	ND
Santa María	Mepraia sp.	7	37.2766	NQ	ND	ND	ND
Santa María	Mepraia sp.	8	no Ct	NQ	ND	ND	ND
Santa María	Mepraia sp.	9	42.6801	NQ	ND	ND	ND
Santa María	Mepraia sp.	10	no Ct	NQ	ND	ND	ND
Santa María	Mepraia sp.	11	no Ct	NQ	ND	ND	ND
Santa María	Mepraia sp.	12	31.8428	NQ	ND	ND	ND
Santa María	Mepraia sp.	13	no Ct	NQ	ND	ND	ND
Santa María	Mepraia sp.	14	46.5215	NQ	ND	ND	ND
Santa María	Mepraia sp.	15	no Ct	NQ	ND	ND	ND
Santa María	Mepraia sp.	16	46.586	NQ	ND	ND	ND
Santa María	Mepraia sp.	17	no Ct	NQ	ND	ND	ND
Santa María	Mepraia sp.	18	33.4297	NQ	ND	ND	ND
Santa María	Mepraia sp.	19	no Ct	NQ	ND	ND	ND
Santa María	Mepraia sp.	20	no Ct	NQ	ND	ND	ND
Santa María	Mepraia sp.	21	no Ct	NQ	ND	ND	ND
Santa María	Mepraia sp.	22	34.564	NQ	ND	ND	ND
Santa María	Mepraia sp.	23	35.4221	NQ	ND	ND	ND
Santa María	Mepraia sp.	24	no Ct	NQ	ND	ND	ND
Santa María	Mepraia sp.	25	no Ct	NQ	ND	ND	ND
Santa María	Mepraia sp.	26	44.518	NQ	ND	ND	ND
Santa María	Mepraia sp.	27	41.1182	NQ	ND	ND	ND
Santa María	Mepraia sp.	28	no Ct	NQ	ND	ND	ND
Santa María	Mepraia sp.	29	no Ct	NQ	ND	ND	ND
Santa María	Mepraia sp.	30	no Ct	NQ	ND	ND	ND
Santa María	Mepraia sp.	31	no Ct	NQ	ND	ND	ND
Santa María	Mepraia sp.	32	no Ct	NQ	ND	ND	ND
Santa María	Mepraia sp.	33	no Ct	NQ	ND	ND	ND
Santa María	Mepraia sp.	34	no Ct	NQ	ND	ND	ND
Santa María	Mepraia sp.	35	no Ct	NQ	ND	ND	ND
Santa María	Mepraia sp.	36	no Ct	NQ	ND	ND	ND
Santa María	Mepraia sp.	37	no Ct	NQ	ND	ND	ND
Santa María	Mepraia sp.	38	no Ct	NQ	ND	ND	ND
Pan de Azúcar	Mepraia parapatrica	1	28.687	NQ	ND	ND	ND
Pan de Azúcar	Mepraia parapatrica	2	33.6908	NQ	ND	ND	ND
Pan de Azúcar	Mepraia parapatrica	3	no Ct	NQ	ND	ND	ND
Pan de Azúcar	Mepraia parapatrica	4	no Ct	NQ	ND	ND	ND
Pan de Azúcar	Mepraia parapatrica	5	31.9324	NQ	ND	ND	ND
Pan de Azúcar	Mepraia parapatrica	6	32.1321	NQ	ND	ND	ND
Pan de Azúcar	Mepraia parapatrica	7	no Ct	NQ	ND	ND	ND
Pan de Azúcar	Mepraia parapatrica	8	32.2254	NQ	ND	ND	ND
Pan de Azúcar	Mepraia parapatrica	9	32.488	NQ	ND	ND	ND
Pan de Azúcar	Mepraia parapatrica	10	33.891	NQ	ND	ND	ND
Pan de Azúcar	Mepraia parapatrica	11	no Ct	NQ	ND	ND	ND
Pan de Azúcar	Mepraia parapatrica	12	no Ct	NQ	ND	ND	ND
Pan de Azúcar	Mepraia parapatrica	13	no Ct	NQ	ND	ND	ND
Pan de Azúcar	Mepraia parapatrica	14	no Ct	NQ	ND	ND	ND
Pan de Azúcar	Mepraia parapatrica	15	33.4346	NQ	ND	ND	ND
Pan de Azúcar	Mepraia parapatrica	16	no Ct	NQ	ND	ND	ND
Pan de Azúcar	Mepraia parapatrica	17	31.9136	NQ	ND	ND	ND
Pan de Azúcar	Mepraia parapatrica	18	no Ct	NQ	ND	ND	ND
Pan de Azúcar	Mepraia parapatrica	19	31.6201	NQ	ND	ND	ND
Pan de Azúcar	Mepraia parapatrica	20	no Ct	NQ	ND	ND	ND
Pan de Azúcar	Mepraia parapatrica	21	no Ct	NQ	ND	ND	ND
Pan de Azúcar	Mepraia parapatrica	22	no Ct	NQ	ND	ND	ND
Pan de Azúcar	Mepraia parapatrica	23	33.9031	NQ	ND	ND	ND
Pan de Azúcar	Mepraia parapatrica	24	no Ct	NQ	ND	ND	ND
Pan de Azúcar	Mepraia parapatrica	25	no Ct	NQ	ND	ND	ND
Pan de Azúcar	Mepraia parapatrica	26	33.8761	NQ	ND	ND	ND
Pan de Azúcar	Mepraia parapatrica	27	no Ct	NQ	ND	ND	ND
Pan de Azúcar	Mepraia parapatrica	28	no Ct	NQ	ND	ND	ND
Pan de Azúcar	Mepraia parapatrica	29	no Ct	NQ	ND	ND	ND
Pan de Azúcar	Mepraia parapatrica	30	no Ct	NQ	ND	ND	ND
Pan de Azúcar	Mepraia parapatrica	31	no Ct	NQ	ND	ND	ND
Pan de Azúcar	Mepraia parapatrica	32	no Ct	NQ	ND	ND	ND
Pan de Azúcar	Mepraia parapatrica	33	no Ct	NQ	ND	ND	ND
Pan de Azúcar	Mepraia parapatrica	34	no Ct	NQ	ND	ND	ND
Pan de Azúcar	Mepraia parapatrica	35	no Ct	NQ	ND	ND	ND
Pan de Azúcar	Mepraia parapatrica	36	no Ct	NQ	ND	ND	ND
Pan de Azúcar	Mepraia parapatrica	37	no Ct	NQ	ND	ND	ND
Pan de Azúcar	Mepraia parapatrica	38	no Ct	NQ	ND	ND	ND
Pan de Azúcar	Mepraia parapatrica	39	no Ct	NQ	ND	ND	ND
Pan de Azúcar	Mepraia parapatrica	40	no Ct	NQ	ND	ND	ND
Pan de Azúcar	Mepraia parapatrica	41	no Ct	NQ	ND	ND	ND
Pan de Azúcar	Mepraia parapatrica	42	no Ct	NQ	ND	ND	ND
Pan de Azúcar	Mepraia parapatrica	43	no Ct	NQ	ND	ND	ND
Pan de Azúcar	Mepraia parapatrica	44	no Ct	NQ	ND	ND	ND
Pan de Azúcar	Mepraia parapatrica	45	no Ct	NQ	ND	ND	ND
Pan de Azúcar	Mepraia parapatrica	46	no Ct	NQ	ND	ND	ND
Pan de Azúcar	Mepraia parapatrica	47	no Ct	NQ	ND	ND	ND
Pan de Azúcar	Mepraia parapatrica	48	no Ct	NQ	ND	ND	ND
Pan de Azúcar	Mepraia parapatrica	49	no Ct	NQ	ND	ND	ND
Pan de Azúcar	Mepraia parapatrica	50	no Ct	NQ	ND	ND	ND
Pan de Azúcar	Mepraia parapatrica	51	no Ct	NQ	ND	ND	ND
Pan de Azúcar	Mepraia parapatrica	52	no Ct	NQ	ND	ND	ND
Pan de Azúcar	Mepraia parapatrica	53	no Ct	NQ	ND	ND	ND
Pan de Azúcar	Mepraia parapatrica	54	no Ct	NQ	ND	ND	ND
Pan de Azúcar	Mepraia parapatrica	55	no Ct	NQ	ND	ND	ND
Pan de Azúcar	Mepraia parapatrica	56	no Ct	NQ	ND	ND	ND
Pan de Azúcar	Mepraia parapatrica	57	no Ct	NQ	ND	ND	ND
Pan de Azúcar	Mepraia parapatrica	58	no Ct	NQ	ND	ND	ND
Pan de Azúcar	Mepraia parapatrica	59	no Ct	NQ	ND	ND	ND
